# Supplementary material for: Early detection of myocardial ischemia in resting ECG: analysis by HHT
Source: Biomed Eng Online. 2023 Mar 10;22:23. doi: 10.1186/s12938-023-01089-9 (PMC9999640; doi:10.1186/s12938-023-01089-9)
Supplement: Supplementary file 2 — Additional file 2. CT ≥ 50% * 8.xlsx [file 12938_2023_1089_MOESM2_ESM.xlsx]

## Sheet: 工作表3
Number	Gender	Age	Medical Order	RT intensity index
CT≥50%001	1	44	SVD、d-RCA55%、Hyperlipidemia、Diabetes	0.36
CT≥50%002	2	61	CTA: P-LAD5=50-69%、Hypertension	0.29
CT≥50%003	2	54	p-LAD 50% stenosis、Hyperlipidemia	0.3
CT≥50%004	1	43	TVD、Hypertension、Hyperlipidemia	0.21
CT≥50%005	1	46	LAD(Ostium) 80% stenosis、Hypertension、Hyperlipidemia	0.33
CT≥50%006	1	59	DVD、d-LCX、75%、Hyperlipidemia、Diabetes	0.45
CT≥50%007	1	59	Hyperlipidemia、Diabetes、2015 CTA + Angiography (VGH) : CAD, DVD (p-RCA 70%, m-LAD 50%)	0.26
CT≥50%008	2	61	m-LAD 75% stenosis post PCI + stent (Biofreedom 2.75x 24)	0.26
