# Supplementary material for: Early detection of myocardial ischemia in resting ECG: analysis by HHT
Source: Biomed Eng Online. 2023 Mar 10;22:23. doi: 10.1186/s12938-023-01089-9 (PMC9999640; doi:10.1186/s12938-023-01089-9)
Supplement: Supplementary file 4 — Additional file 4. CT < 50% *14.xlsx [file 12938_2023_1089_MOESM4_ESM.xlsx]

## Sheet: 工作表1
Number	Gender	Age	Medical Order	RT intensity index
CT<50%001	1	57	p-RCA 30% stenosis、Hyperlipidemia、Hypertension	0.26
CT<50%002	1	57	CTA: Myocardial bridge、Hyperlipidemia、Hypertension	0.28
CT<50%003	1	43	CTA: P-LAD 25-50%、Hyperlipidemia、Hypertension	0.28
CT<50%004	1	48	p-LAD 30% and p-LCX 30% stenosis、Hyperlipidemia、Hypertension、HX	0.3
CT<50%005	1	38	m-LAD 30% stenosis , m-LAD bridge formation、Hyperlipidemia、Hypertension、Diabetes	0.33
CT<50%006	2	41	Hyperlipidemia、A short segmental myocardial bridge at the distal third of LAD	0.17
CT<50%007	2	45	m-LAD 20% stenosis、Hyperlipidemia	0.19
CT<50%008	1	53	LCX-P : 28 %、Hyperlipidemia、Hypertension	0.2
CT<50%009	2	55	Hyperlipidemia、Patent coronary artery TIMI 2 flow of LAD、TIMI	0.26
CT<50%010	2	48	p-LAD 30% stenosis、Hyperlipidemia、Hypertension、Diabetes	0.3
CT<50%011	1	54	CTA: LAD bridge、Hyperlipidemia、Hypertension	0.31
CT<50%012	2	44	d-LAD 30% stenosis、Hyperlipidemia、Hypertension	0.35
CT<50%013	2	50	Patent coronary artery : slow flow、Hyperlipidemia	0.29
CT<50%014	1	53	Hyperlipidemia、Hypertension、Patent coronary artery : slow flow	0.28
