# Supplementary material for: Early detection of myocardial ischemia in resting ECG: analysis by HHT
Source: Biomed Eng Online. 2023 Mar 10;22:23. doi: 10.1186/s12938-023-01089-9 (PMC9999640; doi:10.1186/s12938-023-01089-9)
Supplement: Supplementary file 13 — Additional file 13. RT Intensity Index.xlsx [file 12938_2023_1089_MOESM13_ESM.xlsx]

## Sheet: 工作表1
Groop	RT Intensity Index
1	0.12
1	0.15
1	0.15
1	0.15
1	0.16
1	0.16
1	0.17
1	0.17
1	0.18
1	0.18
1	0.19
1	0.19
1	0.19
1	0.2
1	0.21
1	0.21
1	0.21
1	0.22
1	0.22
1	0.22
1	0.22
1	0.22
1	0.22
1	0.22
1	0.23
1	0.23
1	0.23
1	0.23
1	0.23
1	0.24
1	0.24
1	0.24
1	0.26
1	0.26
1	0.26
1	0.26
1	0.26
1	0.27
1	0.27
1	0.28
1	0.28
1	0.28
1	0.28
1	0.28
1	0.28
1	0.28
1	0.28
2	0.3
2	0.17
2	0.25
2	0.29
3	0.26
3	0.28
3	0.28
3	0.3
3	0.33
3	0.17
3	0.19
3	0.2
3	0.26
3	0.3
3	0.31
3	0.35
3	0.29
3	0.28
4	0.36
4	0.29
4	0.3
4	0.21
4	0.33
4	0.45
4	0.26
4	0.26
